# Supplementary material for: Nuclear DJ-1 Regulates DNA Damage Repair via the Regulation of PARP1 Activity
Source: MDPI journal article supplement (doi:10.3390/ijms24108651), 2023-05-12
Supplement: s1 [file s1]

## 1 Supplementary Information

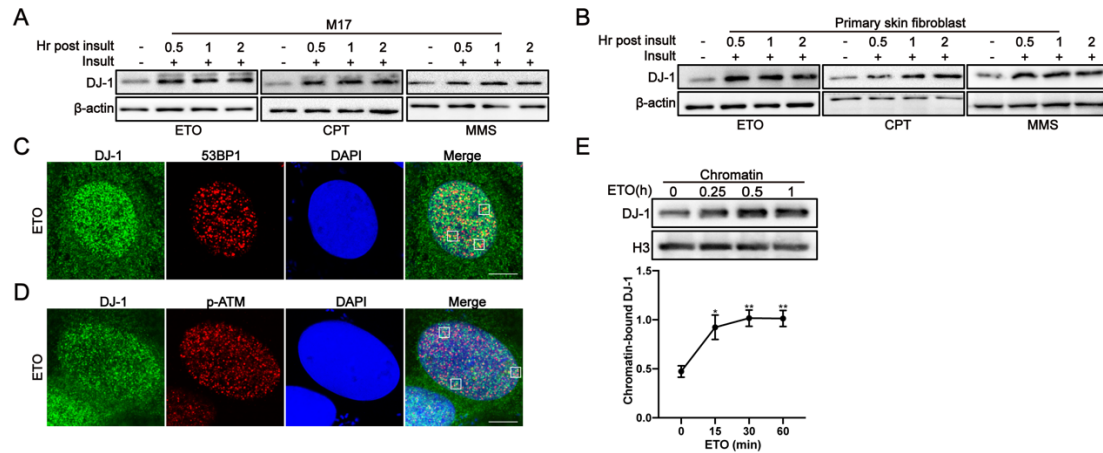

**Figure S1.** DJ-1 responds to DSBs. (A, B) Representative western blot of DJ-1 in M17 cells and primary human skin fibroblasts treated with ETO (10  $\mu$ M), CPT (10  $\mu$ M), and MMS (0.01%) at the indicated timepoints.  $n = 3$ . (C) Representative immunostaining of 53BP1 and DJ-1 following ETO (10  $\mu$ M, 30 min) treatment in U2OS cells. Scale bar, 10  $\mu$ m.  $n=3$ . (D) Representative immunostaining of p-S1981-ATM and DJ-1 following ETO (10  $\mu$ M, 30 min) treatment in U2OS cells. Scale bar, 10  $\mu$ m.  $n=3$ . (E) Representative western blot and quantification of DJ-1 in chromatin fraction following ETO (10  $\mu$ M) treatment at the indicated timepoints in U2OS cells. Histone H3 was used as positive marker for chromatin fraction. Data are presented as the mean  $\pm$  SD,  $n=3$ . \*,  $P < 0.05$ ; \*\*,  $P < 0.01$  (two tailed t-test).

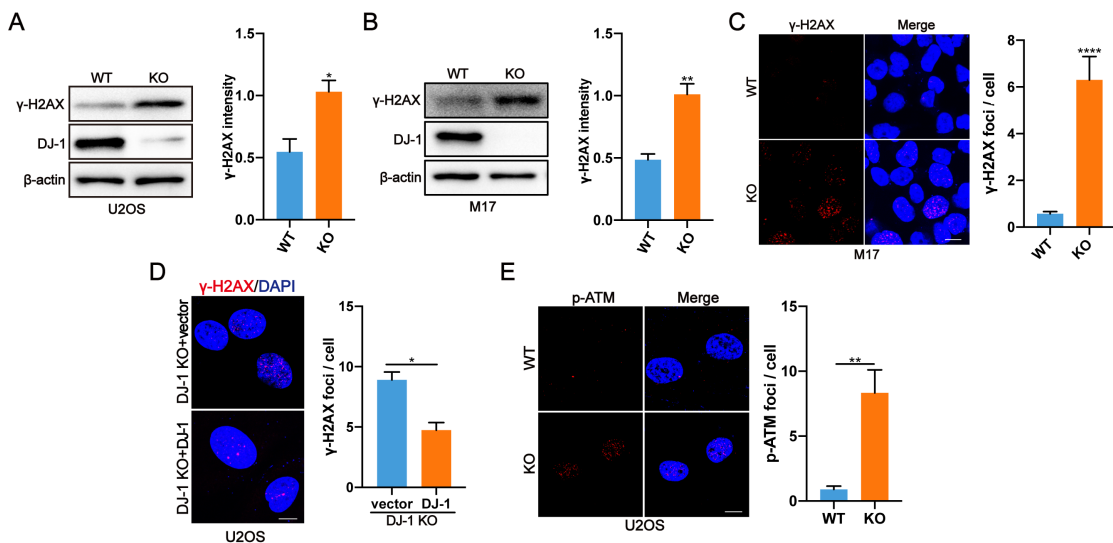

**Figure S2.** Loss of DJ-1 results in DNA damage accumulation and activation of DNA

16 damage response signaling. (A, B) Representative western blot and quantification of  $\gamma$ -  
17 H2AX in DJ-1 KO and WT U2OS (A) and M17 (B) cells. Data are presented as the  
18 mean  $\pm$  SD,  $n = 3$ . \*,  $P < 0.05$ ; \*\*,  $P < 0.01$  (two tailed t-test). (C) Representative  
19 immunofluorescence images and quantification of  $\gamma$ H2Ax foci in WT and DJ-1 KO  
20 M17 cells. Scale bar, 10  $\mu$ m. Data are presented as the mean  $\pm$  SEM,  $n > 150$  cells. \*\*\*\*,  
21  $P < 0.0001$  (two tailed t-test). (D) Representative immunofluorescence images and  
22 quantification of  $\gamma$ H2Ax foci in DJ-1 KO U2OS cells with and without DJ-1 stable  
23 expression. Scale bar, 10  $\mu$ m. Data are presented as the mean  $\pm$  SEM,  $n > 150$  cells. \*,  
24  $P < 0.05$  (two tailed t-test). (E) Representative immunofluorescence images and  
25 quantification of p-ATM-S1981 foci in WT and DJ-1 KO U2OS cells. Scale bar, 10  $\mu$ m.  
26 Data are presented as the mean  $\pm$  SEM,  $n > 150$  cells. \*\*,  $P < 0.01$  (two tailed t-test).

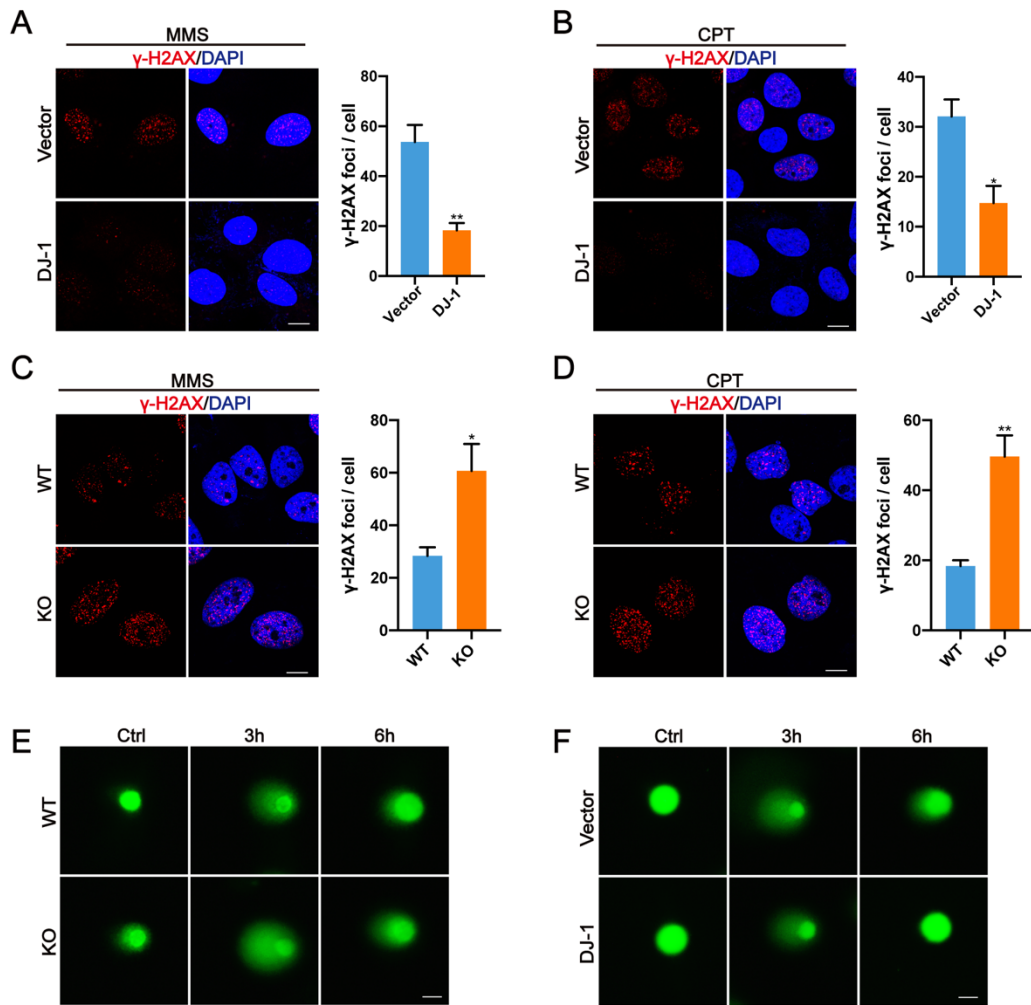

32

33 **Figure S3.** DJ-1 enhances DNA repair. (A, B) Representative immunofluorescence  
 34 images and quantification of  $\gamma$ -H2AX foci in WT and stable expression of DJ-1 U2OS  
 35 cells after MMS (A) or CPT (B) treatment. Cells were treated with MMS (0.01%, 1h)  
 36 or CPT (10  $\mu$ M, 1h), and were allowed to recover for 8 h. Scale bar, 10  $\mu$ m. Data are  
 37 presented as the mean  $\pm$  SEM,  $n > 150$  cells. \*,  $P < 0.05$ ; \*\*,  $P < 0.01$  (two tailed t-test).  
 38 (C, D) Representative immunofluorescence images and quantification of  $\gamma$ -H2AX foci  
 39 in DJ-1 KO and WT U2OS cells after MMS (C) or CPT (D) treatment. Cells were  
 40 treated with MMS (0.01%, 1h) or CPT (10  $\mu$ M, 1h), and were allowed to recover for 8  
 41 h. Scale bar, 10  $\mu$ m. Data are presented as the mean  $\pm$  SEM,  $n > 150$  cells. \*,  $P < 0.05$ ;  
 42 \*\*,  $P < 0.01$  (two tailed t-test). (E, F) Representative images of tail moments in DJ-1  
 43 KO (E) or stable expression of DJ-1 (F) U2OS cells treated with ETO (10  $\mu$ M, 1 h) as  
 44 determined by a neutral comet assay. Scale bar, 10  $\mu$ m.

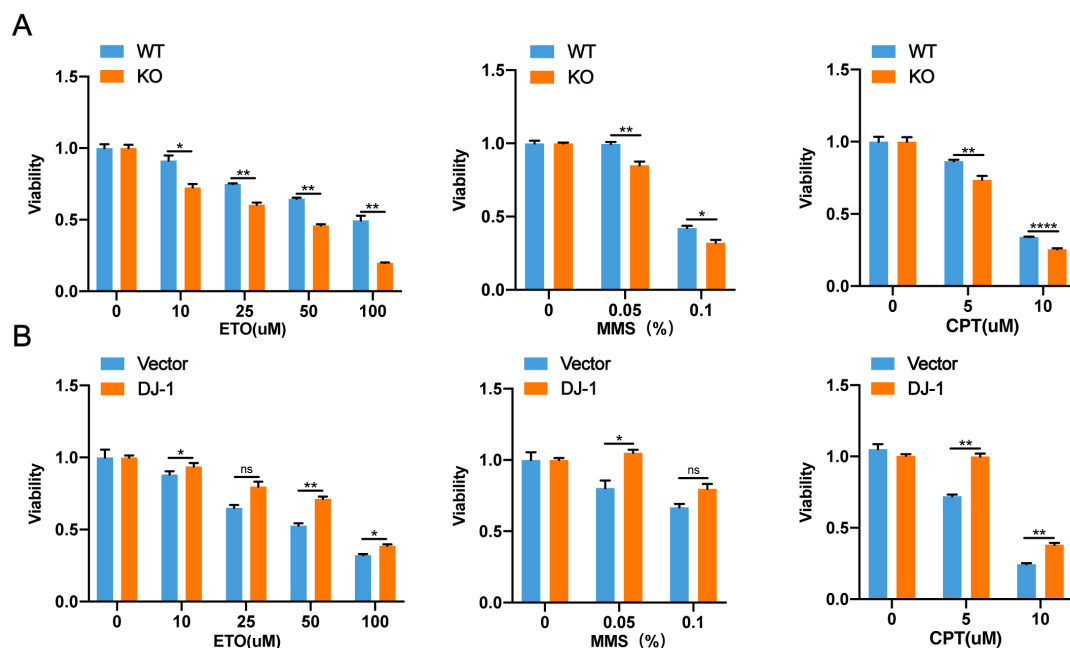

**Figure S4.** DJ-1 protects cells against genotoxic agents. (A) Viabilities of DJ-1 KO and WT U2OS cells after treatment with ETO (24h), MMS (6h) and CPT (12h) as indicated doses. Cell viability was determined by CCK-8 assays. Data are presented as the mean  $\pm$  SEM,  $n = 5$ . \*,  $P < 0.05$ ; \*\*,  $P < 0.01$ ; \*\*\*\*,  $P < 0.0001$  (two tailed t-test). (B) Viabilities of WT and stable expression of DJ-1 U2OS cells after treatment with ETO (24h), MMS (6h) and CPT (12h) as indicated doses. Cell viability was determined by CCK-8 assays. Data are presented as the mean  $\pm$  SEM,  $n = 5$ . \*,  $P < 0.05$ ; \*\*,  $P < 0.01$ ; ns, nonsignificant (two tailed t-test).

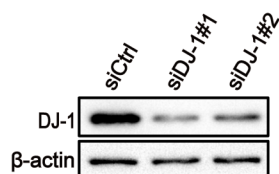

**Figure S5.** Verification of the siRNA of DJ-1 used in this study. Different siRNAs targeting human DJ-1 were transfected into 293T cells for 72 h and cell lysate was collected for western blot.

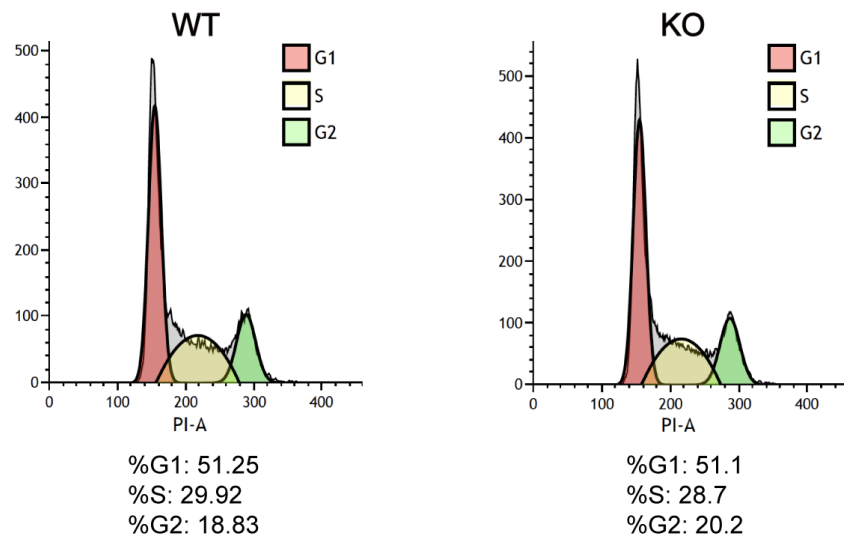

**Figure S6.** Depletion of DJ-1 in U2OS cells does not significantly change the cell cycle distribution. Representative cell cycle profiles of DJ-1 WT vs KO cells. Histogram data are representative of 3 independent experiments.

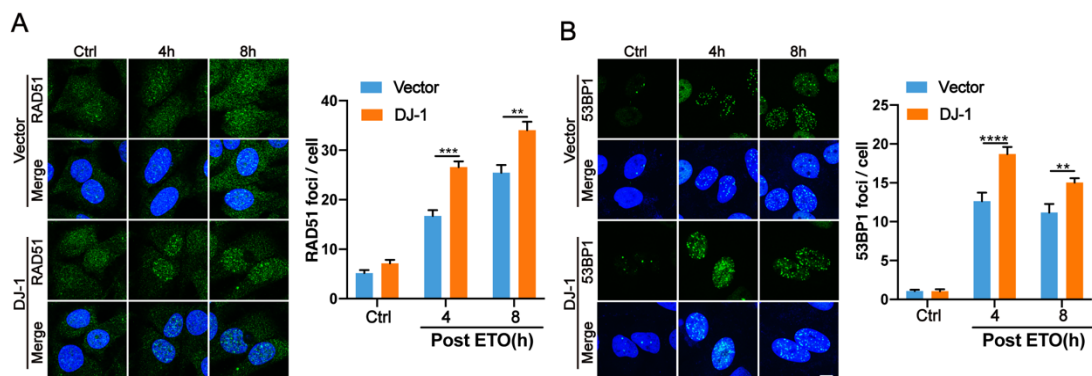

**Figure S7.** DJ-1 increases RAD51 and 53BP1 foci after DNA damage. (A) Representative immunofluorescence images and quantification of RAD51 foci in WT and stable expression of DJ-1 U2OS cells treated with ETO (10  $\mu$ M, 1 h) at the indicated time points. Scale bar, 10  $\mu$ m. Data are presented as the mean  $\pm$  SEM,  $n > 150$  cells. \*\*,  $P < 0.01$ ; \*\*\*,  $P < 0.001$  (two tailed t-test). (B) Representative immunofluorescence images and quantification of 53BP1 foci in WT and stable expression of DJ-1 U2OS cells treated with ETO (10  $\mu$ M, 1 h) at the indicated time points. Scale bar, 10  $\mu$ m. Data are presented as the mean  $\pm$  SEM,  $n > 150$  cells. \*\*,  $P < 0.01$ ; \*\*\*\*,  $P < 0.0001$  (two tailed t-test).

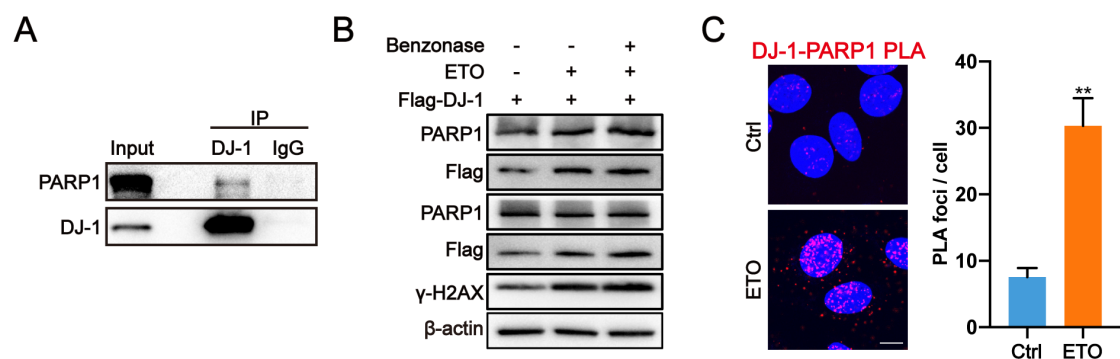

**Figure S8.** DJ-1 interacts with PARP1 in response to DNA damage. (A) Representative endogenous co-immunoprecipitation (Co-IP) analysis of DJ-1 and PARP1 in HEK293T cells. (B) Representative Co-IP analysis of DJ-1 and PARP1 after ETO (10  $\mu$ M, 1h) in the presence of Benzonase in HEK293T cells. (C) Representative PLA signals between DJ-1 and PARP1 in U2OS cells following ETO (10  $\mu$ M, 1 h) treatment. Quantification of average PLA signals was shown at right. Scale bar, 10 $\mu$ m. Data are presented as the mean  $\pm$  SEM, n > 100 cells. \*\*,  $P$  < 0.01 (two tailed t-test).

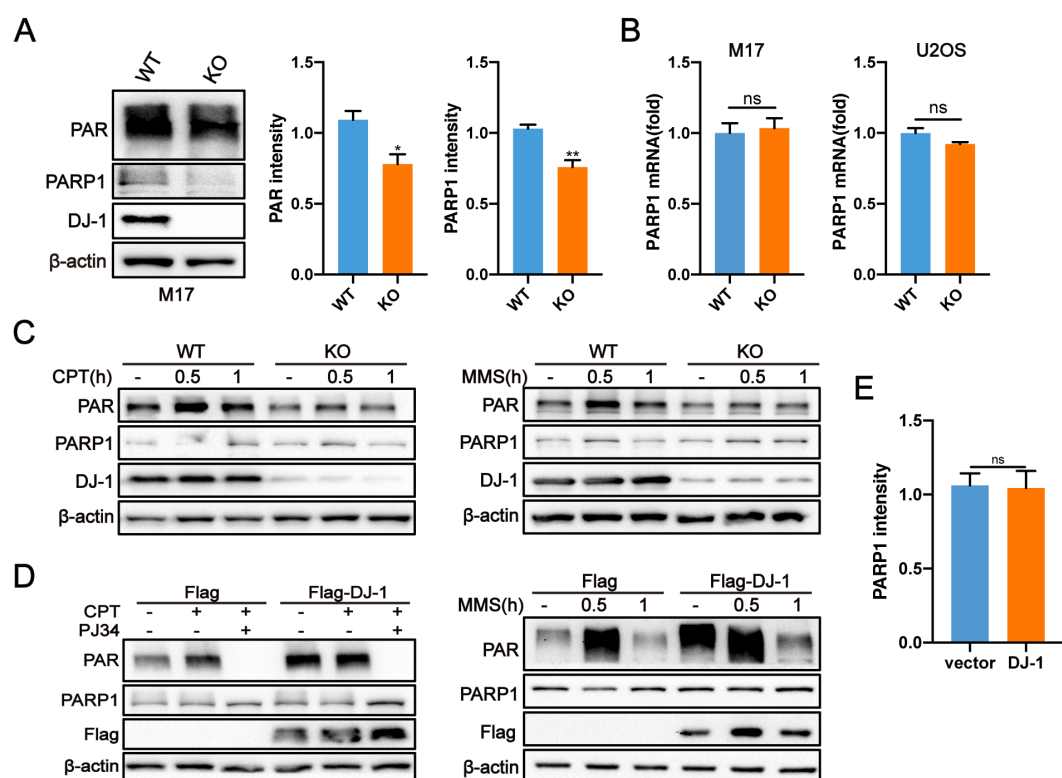

**Figure S9.** DJ-1 facilitates PARP1 activity upon DNA damage. (A) Representative western blot and quantification of PAR and PARP1 proteins in DJ-1 KO and WT M17 cells. Data are presented as the mean  $\pm$  SD, n = 3. \*,  $P$  < 0.05; \*\*,  $P$  < 0.01 (two tailed

t-test). (B) Transcript levels of PARP1 were determined by qPCR in WT and DJ-1 KO M17 (left) and U2OS (right) cells. GAPDH was used to normalize expression. Data are presented as the mean  $\pm$  SEM, n=3. ns, nonsignificant (two tailed t-test). (C) Representative western blot of PAR and PARP1 in DJ-1 KO U2OS cells treated with CPT (10  $\mu$ M, left), or MMS (0.01%, right) at the indicated timepoints. n=3. (D) Representative western blot of PAR and PARP1 in U2OS expressing Flag-DJ-1 treated with CPT (10  $\mu$ M, left) and MMS (0.01%, right) in the presence and absence of PJ34 (10  $\mu$ M). n=3. (E) Quantification of PARP1 expression in U2OS cells expressing Flag-DJ-1. Data are presented as the mean  $\pm$  SD, n = 3. ns, nonsignificant (two tailed t-test).

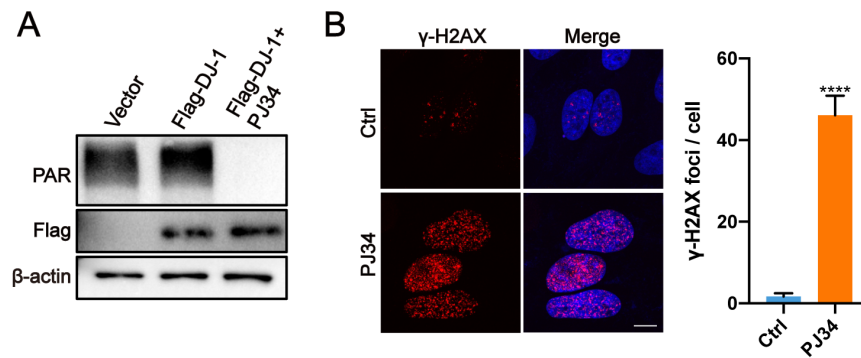

**Figure S10.** PARP1 inhibition by PJ34 results in DNA damage accumulation. (A) Representative western blot of PAR in HEK293T cells expressing Flag-DJ-1 treated with PJ34. (B) Representative immunofluorescence images and quantification of  $\gamma$ -H2AX foci in U2OS cells treated with PJ34 (10  $\mu$ M, 12 h). Scale bar, 10  $\mu$ m. Data are presented as the mean  $\pm$  SEM, n > 150 cells. \*\*\*\*,  $P < 0.0001$  (two tailed t-test).

**Table S1. qPCR primers and siRNA sequences**

| Human qPCR primers | Forward and reverse oligo. sequences | siRNA sequences        |                          |
|--------------------|--------------------------------------|------------------------|--------------------------|
| DJ-1-F             | GTCCTACTGCTCTGTTGGCTCA               | DJ-1 siRNA-1-sense     | AGCAGACUCAGAUAAAUCUGUGC  |
| DJ-1-R             | CCACACGATTCTCAGAGTAGGTG              | DJ-1 siRNA-1-antisense | CGCACAGAAUUUUCUGAGUCUGC  |
| PARP1-F            | CCAAGCCAGTTCAGGACCTCAT               | DJ-1 siRNA-2-sense     | CCAGCUUCGAGUUUGCGCUUGCAA |
| PARP1-R            | GGATCTGCCTTTTGCTCAGCTTC              | DJ-1 siRNA-2-antisense | AUUGCAAGCGCAAACUCGAAGCUG |
| GAPDH-F            | GTCTCCTCTGACTTCAACAGCG               |                        |                          |
| GAPDH-R            | ACCACCCTGTTGCTGTAGCCAA               |                        |                          |
